# Supplementary material
Source: publisher site journal article supplement (https://www.dovepress.com/get_supplementary_file.php?f=476394.docx)
Supplement: Supplementary file 1 [file get_supplementary_file.php]

**Supplementary Figure**

**
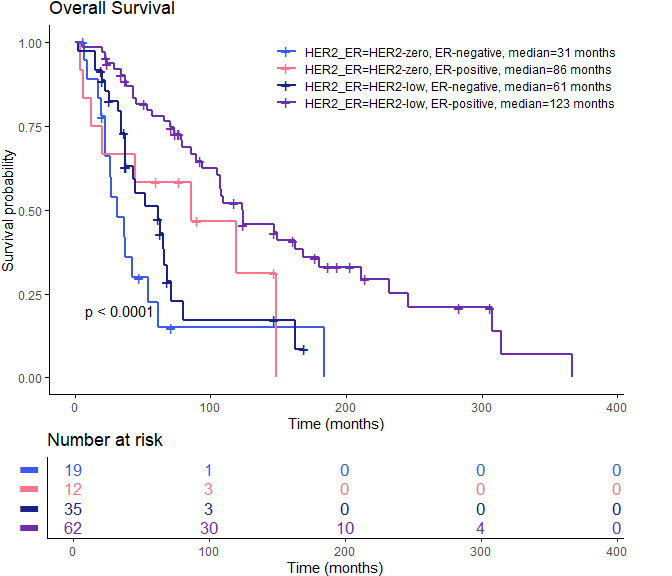
**

**Pairwise Kaplan-Meier Comparison p-values**

|  | HER2-zero, ER-negative | HER2-zero, ER-positive | HER2-low, ER-negative |
| --- | --- | --- | --- |
| HER2-low, ER-positive | 2.3×10-6 | 0.15 | 2.5×10-4 |
| HER2-low, ER-negative | 0.17 | 0.49 |  |
| HER2-zero, ER-positive | 0.28 |  |  |

**Figure S1:** Kaplan-Meier survival analysis of HER2-low and HER2 negative groups subdivided by ER status for all patients in the cohort.
